# Supplementary material
Source: publisher figshare collection journal article supplement (https://future-science-group.figshare.com/articles/dataset/_/20342667)
Supplement: Supplementary file 1 [file 1]

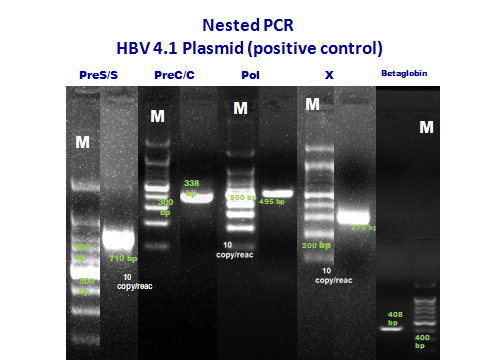


**Supp. Figure:** 2% Agarose gel electrophoresis of nested PCR amplicons of four different regions of the HBV genome. 710, 338, 495, 275, 408 bp PCR amplicons respectively for PreS, PreC, Pol, X gene of HBV and Human beta-globin gene. Abbreviations: M: Marker, 1000 bp DNA ladder.
